# Supplementary material
Source: Springer Nature journal article supplement (https://www.springermedizin.de/resource/supplementary/12877_2011_753_MOESM2_ESM.pdf/9440252)

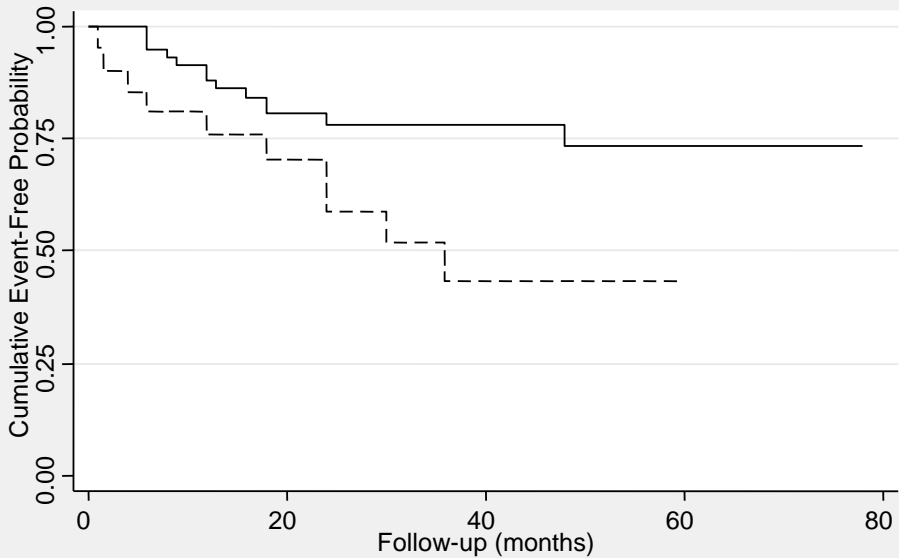

— Nodes = 0    - - - - Nodes = 1-2

Supplement: MOESM2 [file 9440252]
